# Supplementary material
Source: Springer Nature journal article supplement (https://www.springermedizin.de/resource/supplementary/12943_2013_1484_MOESM12_ESM.pdf/9553124)

A

TNF $\alpha$  RT-PCR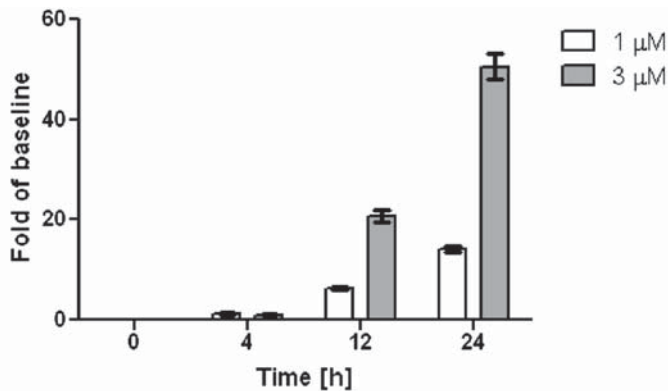

B

TNF $\alpha$  ELISA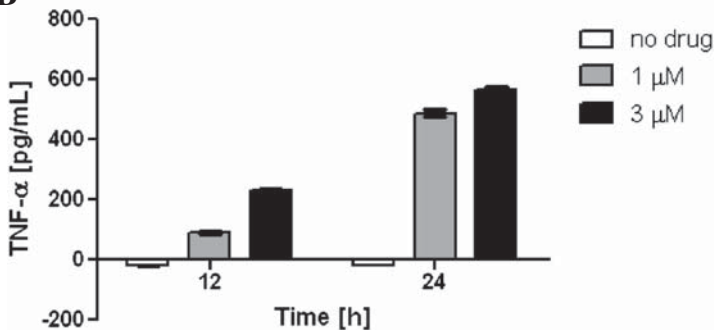

## SKOV3

C

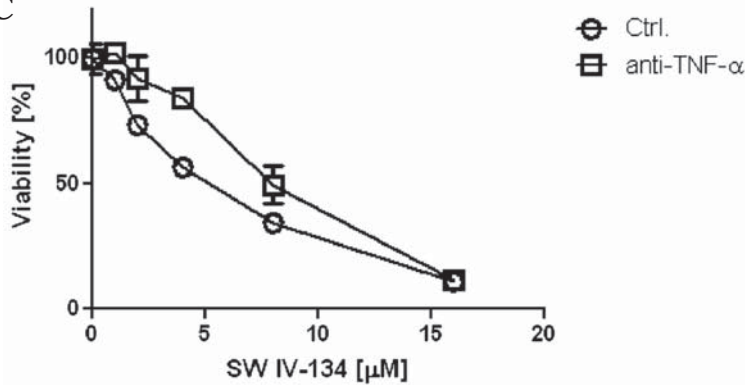

Supplement: MOESM12 [file 9553124]
